# Supplementary material
Source: publisher site journal article supplement (https://www.spandidos-publications.com/2290/downloadSupplementary)
Supplement: Supplementary file 1 [file downloadSupplementary]

Table SI. Clinicopathological parameters of patients with IDC.

| Parameters                                                    | Breast cancer (n=25) |
|---------------------------------------------------------------|----------------------|
| Age (years)                                                   | 47.71±9.12           |
| Height (m)                                                    | 1.56±0.05            |
| Weight (kg)                                                   | 57.26±8.89           |
| Body mass index (kg/m <sup>2</sup> )                          | 23.74±4.35           |
| ER <sup>+</sup> , n (%)                                       | 19 (76)              |
| ER <sup>-</sup> , n (%)                                       | 6 (24)               |
| PR <sup>+</sup> , n (%)                                       | 18 (72)              |
| PR <sup>-</sup> , n (%)                                       | 7 (28)               |
| ER <sup>+</sup> /PR <sup>+</sup> , n (%)                      | 13 (52)              |
| ER <sup>-</sup> /PR <sup>-</sup> , n (%)                      | 3 (12)               |
| HER2 <sup>+</sup> , n (%)                                     | 5 (20)               |
| HER2 <sup>-</sup> , n (%)                                     | 9 (36)               |
| ER <sup>+</sup> /PR <sup>+</sup> , HER-2 <sup>-</sup> , n (%) | 7 (28)               |
| ER <sup>+</sup> /PR <sup>+</sup> , HER-2 <sup>+</sup> , n (%) | 3 (12)               |
| ER <sup>-</sup> /PR <sup>-</sup> , HER-2 <sup>+</sup> , n (%) | 2 (8)                |
| ER <sup>-</sup> /PR <sup>-</sup> , HER-2 <sup>-</sup> , n (%) | 2 (8)                |
| Lymphatic metastasis, n (%)                                   | 7 (28)               |
| Tumor size (cm)                                               | 2.15±0.71            |
| Stage 0, n (%)                                                | 2 (8)                |
| Stage 1, n (%)                                                | 3 (12)               |
| Stage 2, n (%)                                                | 5 (20)               |
| Stage 3, n (%)                                                | 15 (60)              |

Values are presented as number (percentage) or mean ± SD. IDC, invasive ductal carcinoma; ER, estrogen receptor; PR, progesterone receptor; HER-2, human epidermal growth factor receptor 2.

Table SII. Serum FFA levels in patients with IDC and healthy controls.

| No. | RT    | FFAs ( $\mu\text{g/ml}$ ) | Healthy control (n=19) | IDC (n=25)  | P-value             | Change | Mean fold |
|-----|-------|---------------------------|------------------------|-------------|---------------------|--------|-----------|
| 1   | 17.04 | C12:0                     | 34.5887879             | 37.96937501 | 0.6305              | ↑      | 1.10      |
| 2   | 19.76 | C14:0                     | 194.8496605            | 238.919325  | 0.0087 <sup>b</sup> | ↑      | 1.23      |
| 3   | 21.5  | C15:0                     | 33.68282117            | 54.21263189 | 0.0008 <sup>c</sup> | ↑      | 1.61      |
| 4   | 23.31 | C16:1                     | 59.90275083            | 90.10916183 | 0.1076              | ↑      | 1.50      |
| 5   | 23.8  | C16:0                     | 3545.346856            | 4376.244155 | 0.0191 <sup>a</sup> | ↑      | 1.23      |
| 6   | 27.77 | C18:2                     | 2126.503947            | 3060.884378 | 0.0338 <sup>a</sup> | ↑      | 1.44      |
| 7   | 27.89 | C18:1                     | 1479.430689            | 2515.951543 | 0.0017 <sup>b</sup> | ↑      | 1.70      |
| 8   | 28.44 | C18:0                     | 2468.298307            | 2988.826595 | 0.0312 <sup>a</sup> | ↑      | 1.21      |
| 9   | 31.31 | C20:4                     | 407.1559372            | 688.1518609 | 0.014 <sup>a</sup>  | ↑      | 1.69      |
| 10  | 31.68 | C20:3                     | 81.36529209            | 134.715364  | 0.0926              | ↑      | 1.66      |
| 11  | 32.17 | C20:1                     | 19.05303406            | 38.09160524 | 0.0343 <sup>a</sup> | ↑      | 2.00      |
| 12  | 32.74 | C20:0                     | 29.94057555            | 42.44137519 | 0.0367 <sup>a</sup> | ↑      | 1.42      |
| 13  | 36.18 | C22:6                     | 100.3944558            | 169.9744756 | 0.0236 <sup>a</sup> | ↑      | 1.69      |
| 14  | 36.58 | C22:4                     | 23.85014306            | 42.36758227 | 0.043 <sup>a</sup>  | ↑      | 1.78      |
| 15  | 37.55 | C22:1                     | 38.33857879            | 43.77456635 | 0.3024              | ↑      | 1.14      |
| 16  | 38.15 | C22:0                     | 25.33922039            | 55.78587047 | 0.0077 <sup>b</sup> | ↑      | 2.20      |

RT, retention time, Data are presented as means  $\pm$  SEM. <sup>a</sup>P<0.05, <sup>b</sup>P<0.01, <sup>c</sup>P<0.001 compared with healthy controls; mean fold is the ratio of mean FASN in IDC patients vs. healthy controls. FFA, free fatty acids; IDC, invasive ductal carcinoma; FASN, fatty acid synthase.

Table SIII. Levels of FFAs in patients with IDC exhibiting high and low FASN expression.

| No. | RT    | FFAs ( $\mu\text{g/ml}$ ) | High FASN expression (n=12) | No/low FASN expression (n=13) | P-value | Change |
|-----|-------|---------------------------|-----------------------------|-------------------------------|---------|--------|
| 1   | 23.8  | C16:0                     | 4982.76                     | 3816.39                       | 0.023   | ↑      |
| 2   | 27.89 | C18:1                     | 3175.37                     | 1907.26                       | 0.017   | ↑      |
| 3   | 28.44 | C18:0                     | 3397.54                     | 2611.55                       | 0.015   | ↑      |
| 4   | 31.31 | C20:4                     | 934.08                      | 461.14                        | 0.008   | ↑      |

RT, retention time, Data are presented as means  $\pm$  SEM. <sup>a</sup>P<0.05, <sup>b</sup>P<0.01 compared with healthy controls. FFA, free fatty acids; IDC, invasive ductal carcinoma; FASN, fatty acid synthase.

Table SIII. Top 20 of GO biological process enrichment analysis for differentially expressed genes (P&lt;0.05).

| GO biological process                              | GO         | Count | P-value                |
|----------------------------------------------------|------------|-------|------------------------|
| Regulation of multicellular organismal process     | GO:0051239 | 69    | 4.71x10 <sup>-07</sup> |
| Ossification                                       | GO:0001503 | 15    | 1.06x10 <sup>-06</sup> |
| Skeletal system development                        | GO:0001501 | 21    | 1.27x10 <sup>-06</sup> |
| Extracellular matrix organization                  | GO:0030198 | 17    | 1.43x10 <sup>-06</sup> |
| Extracellular structure organization               | GO:0043062 | 17    | 1.48x10 <sup>-06</sup> |
| Regulation of multicellular organismal development | GO:2000026 | 50    | 1.73x10 <sup>-06</sup> |
| Animal organ development                           | GO:0048513 | 67    | 3.56x10 <sup>-06</sup> |
| System development                                 | GO:0048731 | 85    | 3.71x10 <sup>-06</sup> |
| Anatomical structure morphogenesis                 | GO:0009653 | 50    | 5.51x10 <sup>-06</sup> |
| Skeletal system morphogenesis                      | GO:0048705 | 13    | 1.16x10 <sup>-05</sup> |
| Regulation of developmental process                | GO:0050793 | 56    | 1.19x10 <sup>-05</sup> |
| Animal organ morphogenesis                         | GO:0009887 | 29    | 1.32x10 <sup>-05</sup> |
| Multicellular organism development                 | GO:0007275 | 91    | 1.45x10 <sup>-05</sup> |
| Bone morphogenesis                                 | GO:0060349 | 9     | 1.69x10 <sup>-05</sup> |
| Tube development                                   | GO:0035295 | 26    | 1.79x10 <sup>-05</sup> |
| Multicellular organismal process                   | GO:0032501 | 115   | 3.75x10 <sup>-05</sup> |
| Collagen fibril organization                       | GO:0030199 | 6     | 4.11x10 <sup>-05</sup> |
| Bone development                                   | GO:0060348 | 11    | 5.30x10 <sup>-05</sup> |
| Nucleic acid metabolic process                     | GO:0090304 | 9     | 5.33x10 <sup>-05</sup> |
| Mesenchyme development                             | GO:0060485 | 11    | 8.63x10 <sup>-05</sup> |

GO, Gene Ontology.

Table SIV. Top 20 of GO molecular function enrichment analysis for differentially expressed genes (P&lt;0.05).

| GO molecular function                                        | GO         | Count | P-value                |
|--------------------------------------------------------------|------------|-------|------------------------|
| Glycosaminoglycan binding                                    | GO:0005539 | 16    | 5.21x10 <sup>-08</sup> |
| Hemoglobin binding                                           | GO:0030492 | 5     | 4.06x10 <sup>-07</sup> |
| Extracellular matrix structural constituent                  | GO:0005201 | 11    | 8.27x10 <sup>-06</sup> |
| Heparin binding                                              | GO:0008201 | 11    | 1.26x10 <sup>-05</sup> |
| Sulfur compound binding                                      | GO:1901681 | 12    | 8.52x10 <sup>-05</sup> |
| Serine-type endopeptidase activity                           | GO:0004252 | 9     | 3.26x10 <sup>-04</sup> |
| Signaling receptor binding                                   | GO:0005102 | 36    | 6.44x10 <sup>-04</sup> |
| Serine-type peptidase activity                               | GO:0008236 | 9     | 7.44x10 <sup>-04</sup> |
| Organic cyclic compound binding                              | GO:0097159 | 50    | 7.87x10 <sup>-04</sup> |
| Hydrolase activity, acting on acid phosphorus-nitrogen bonds | GO:0016825 | 9     | 8.83x10 <sup>-04</sup> |
| Serine hydrolase activity                                    | GO:0017171 | 9     | 8.83x10 <sup>-04</sup> |
| Growth factor activity                                       | GO:0008083 | 8     | 1.04x10 <sup>-03</sup> |
| Receptor ligand activity                                     | GO:0048018 | 15    | 1.05x10 <sup>-03</sup> |
| Structural molecule activity                                 | GO:0005198 | 19    | 1.11x10 <sup>-03</sup> |
| Signaling receptor activator activity                        | GO:0030546 | 15    | 1.17x10 <sup>-03</sup> |
| Heterocyclic compound binding                                | GO:1901363 | 50    | 1.25x10 <sup>-03</sup> |
| Endopeptidase activity                                       | GO:0004175 | 14    | 1.46x10 <sup>-03</sup> |
| Chloride transmembrane transporter activity                  | GO:0015108 | 6     | 1.63x10 <sup>-03</sup> |
| Metalloendopeptidase activity                                | GO:0004222 | 6     | 1.88x10 <sup>-03</sup> |
| Integrin binding                                             | GO:0005178 | 7     | 1.93x10 <sup>-03</sup> |

GO, Gene Ontology.

Table SV. Top 20 of GO cellular component enrichment analysis for differentially expressed genes (P&lt;0.05).

| GO cellular component                       | GO         | Count | P-value                |
|---------------------------------------------|------------|-------|------------------------|
| Extracellular region                        | GO:0005576 | 105   | 1.15x10 <sup>-13</sup> |
| Extracellular space                         | GO:0005615 | 78    | 3.78x10 <sup>-09</sup> |
| Specific granule lumen                      | GO:0035580 | 10    | 1.28x10 <sup>-08</sup> |
| Extracellular matrix                        | GO:0031012 | 25    | 1.53x10 <sup>-08</sup> |
| Collagen-containing<br>extracellular matrix | GO:0062023 | 21    | 4.96x10 <sup>-08</sup> |
| Specific granule                            | GO:0042581 | 12    | 1.04x10 <sup>-06</sup> |
| Nucleus                                     | GO:0005634 | 60    | 6.35x10 <sup>-05</sup> |
| Phagocytic vesicle lumen                    | GO:0097013 | 3     | 8.81x10 <sup>-05</sup> |
| Secretory vesicle                           | GO:0099503 | 27    | 1.63x10 <sup>-04</sup> |
| Endocytic vesicle lumen                     | GO:0071682 | 4     | 1.70x10 <sup>-04</sup> |
| Secretory granule lumen                     | GO:0034774 | 13    | 1.83x10 <sup>-04</sup> |
| Cytoplasmic vesicle lumen                   | GO:0060205 | 13    | 2.05x10 <sup>-04</sup> |
| Vesicle lumen                               | GO:0031983 | 13    | 2.18x10 <sup>-04</sup> |
| Endocytic vesicle                           | GO:0030139 | 13    | 2.30x10 <sup>-04</sup> |
| Cellular anatomical entity                  | GO:0110165 | 240   | 2.49x10 <sup>-04</sup> |
| Extracellular exosome                       | GO:0070062 | 44    | 2.93x10 <sup>-04</sup> |
| Phagocytic vesicle                          | GO:0045335 | 8     | 3.12x10 <sup>-04</sup> |
| Secretory granule                           | GO:0030141 | 23    | 3.25x10 <sup>-04</sup> |
| Extracellular vesicle                       | GO:1903561 | 44    | 3.28x10 <sup>-04</sup> |
| Extracellular organelle                     | GO:0043230 | 44    | 3.38x10 <sup>-04</sup> |

GO, Gene Ontology.

Table SVI. Top 20 of Kyoto Encyclopedia of Genes and Genomes pathway enrichment analysis for differentially expressed genes (P<0.05).

| ID       | Description                               | P-value  | Count | GeneID                                                          |
|----------|-------------------------------------------|----------|-------|-----------------------------------------------------------------|
| hsa05150 | Staphylococcus aureus infection           | 0.00061  | 6     | HLA-DRB5, DEFA4, HLA-DQB1, C4B, C4A, KRT17                      |
| hsa04151 | PI3K-Akt signaling pathway                | 0.005105 | 10    | KITLG, FGF18, THBS3, FGF7, ITGA11, GNG2, ITGB8, FGF9, CSH1, GH1 |
| hsa05226 | Gastric cancer                            | 0.005705 | 6     | FGF18, FGF7, FZD7, FGF9, JUP, FZD1                              |
| hsa05221 | Acute myeloid leukemia                    | 0.006083 | 4     | CCNA1, CEBPE, MPO, JUP                                          |
| hsa05133 | Pertussis                                 | 0.009454 | 4     | C4BPA, C4B, C4A, C4BPB                                          |
| hsa04080 | Neuroactive ligand-receptor interaction   | 0.011739 | 9     | TRH, GABRD, EDN2, S1PR1, GABRP, TBXA2R, CSH1, GH1, INSL3        |
| hsa04610 | Complement and coagulation cascades       | 0.013857 | 4     | C4BPA, C4B, C4A, C4BPB                                          |
| hsa05322 | Systemic lupus erythematosus              | 0.015075 | 5     | HLA-DRB5, HLA-DQB1, C4B, C4A, ELANE                             |
| hsa04512 | Extracellular matrix-receptor interaction | 0.015571 | 4     | DMP1, THBS3, ITGA11, ITGB8                                      |
| hsa05202 | Transcriptional misregulation in cancer   | 0.016012 | 6     | CCNA1, CEBPE, MPO, ELANE, COMMD3-BMI1, JUP                      |
| hsa04727 | GABAergic synapse                         | 0.01617  | 4     | ADCY1, GABRD, GNG2, GABRP                                       |
| hsa05032 | Morphine addiction                        | 0.017413 | 4     | ADCY1, GABRD, GNG2, GABRP                                       |
| hsa04974 | Protein digestion and absorption          | 0.020073 | 4     | COL5A1, SLC7A8, COL3A1, COL5A2                                  |
| hsa04514 | Cell adhesion molecules                   | 0.022259 | 5     | HLA-DRB5, HLA-DQB1, VCAN, ITGB8, PTPRF                          |
| hsa05224 | Breast cancer                             | 0.022259 | 5     | FGF18, FGF7, FZD7, FGF9, FZD1                                   |
| hsa04916 | Melanogenesis                             | 0.024513 | 4     | ADCY1, KITLG, FZD7, FZD1                                        |
| hsa04145 | Phagosome                                 | 0.025285 | 5     | HLA-DRB5, HLA-DQB1, THBS3, MPO, COLEC12                         |
| hsa04015 | Rap1 signaling pathway                    | 0.027243 | 6     | ADCY1, KITLG, FGF18, FGF7, EVL, FGF9                            |
| hsa04725 | Cholinergic synapse                       | 0.034091 | 4     | ADCY1, GNG2, KCNJ12, KCNQ5                                      |
| hsa04014 | Ras signaling pathway                     | 0.041318 | 6     | PLA2G2A, KITLG, FGF18, FGF7, GNG2, FGF9                         |

Table SVII. Top 20 of GO biological process enrichment analysis for differentially expressed genes in competing endogenous RNA network (P<0.05).

| GO biological process                              | GO         | Count | P-value                |
|----------------------------------------------------|------------|-------|------------------------|
| Animal organ morphogenesis                         | GO:0009887 | 16    | 6.11x10 <sup>-09</sup> |
| Anatomical structure morphogenesis                 | GO:0009653 | 22    | 2.59x10 <sup>-08</sup> |
| Extracellular matrix organization                  | GO:0030198 | 10    | 3.84x10 <sup>-08</sup> |
| Extracellular structure organization               | GO:0043062 | 10    | 3.95x10 <sup>-08</sup> |
| Ossification                                       | GO:0001503 | 9     | 4.89x10 <sup>-08</sup> |
| System development                                 | GO:0048731 | 31    | 6.46x10 <sup>-08</sup> |
| Osteoblast differentiation                         | GO:0001649 | 7     | 7.48x10 <sup>-08</sup> |
| Multicellular organism development                 | GO:0007275 | 33    | 8.21x10 <sup>-08</sup> |
| Blood vessel development                           | GO:0001568 | 11    | 1.12x10 <sup>-07</sup> |
| Skeletal system development                        | GO:0001501 | 11    | 1.36x10 <sup>-07</sup> |
| Regulation of developmental process                | GO:0050793 | 23    | 1.48x10 <sup>-07</sup> |
| Vasculature development                            | GO:0001944 | 11    | 1.71x10 <sup>-07</sup> |
| Blood vessel morphogenesis                         | GO:0048514 | 10    | 2.04x10 <sup>-07</sup> |
| Cardiovascular system development                  | GO:0072358 | 11    | 2.07x10 <sup>-07</sup> |
| Tube morphogenesis                                 | GO:0035239 | 12    | 2.32x10 <sup>-07</sup> |
| Negative regulation of developmental process       | GO:0051093 | 14    | 2.63x10 <sup>-07</sup> |
| Regulation of multicellular organismal development | GO:2000026 | 20    | 2.96x10 <sup>-07</sup> |
| Negative regulation of cell differentiation        | GO:0045596 | 12    | 5.06x10 <sup>-07</sup> |
| tube development                                   | GO:0035295 | 13    | 5.13x10 <sup>-07</sup> |
| Anatomical structure development                   | GO:0048856 | 33    | 5.75x10 <sup>-07</sup> |

GO, Gene Ontology.

Table SVIII. Top 20 of GO molecular function enrichment analysis for differentially expressed genes in competing endogenous RNA network (P<0.05).

| GO molecular function                                                   | GO         | Count | P-value                |
|-------------------------------------------------------------------------|------------|-------|------------------------|
| Glycosaminoglycan binding                                               | GO:0005539 | 8     | 3.17x10 <sup>-07</sup> |
| Extracellular matrix structural constituent                             | GO:0030492 | 6     | 7.50x10 <sup>-06</sup> |
| Heparin binding                                                         | GO:0005201 | 6     | 9.74x10 <sup>-06</sup> |
| Integrin binding                                                        | GO:0008201 | 5     | 5.10x10 <sup>-05</sup> |
| Sulfur compound binding                                                 | GO:1901681 | 6     | 8.08x10 <sup>-05</sup> |
| Extracellular matrix structural constituent conferring tensile strength | GO:0004252 | 3     | 2.42x10 <sup>-04</sup> |
| Cell adhesion molecule binding                                          | GO:0005102 | 7     | 4.63x10 <sup>-04</sup> |
| Platelet-derived growth factor binding                                  | GO:0008236 | 2     | 6.64x10 <sup>-04</sup> |
| Growth factor binding                                                   | GO:0097159 | 4     | 6.86x10 <sup>-04</sup> |
| Binding                                                                 | GO:0016825 | 53    | 9.13x10 <sup>-04</sup> |
| SMAD binding                                                            | GO:0017171 | 3     | 1.35x10 <sup>-03</sup> |
| Wnt-activated receptor activity                                         | GO:0008083 | 2     | 1.37x10 <sup>-03</sup> |
| Molecular_function                                                      | GO:0048018 | 57    | 1.50x10 <sup>-03</sup> |
|                                                                         | GO:0005198 |       |                        |
| Signaling receptor binding                                              | GO:0030546 | 12    | 1.88x10 <sup>-03</sup> |
| Protein binding                                                         | GO:1901363 | 45    | 2.00x10 <sup>-03</sup> |
| Fibronectin binding                                                     | GO:0004175 | 2     | 3.09x10 <sup>-03</sup> |
| Structural molecule activity                                            | GO:0015108 | 7     | 3.15x10 <sup>-03</sup> |
| Protein-containing complex binding                                      | GO:0004222 | 9     | 4.17x10 <sup>-03</sup> |
| Wnt-protein binding                                                     | GO:0005178 | 2     | 4.42x10 <sup>-03</sup> |

GO, Gene Ontology.

Table SIX. Top 20 of GO cellular component enrichment analysis for differentially expressed genes in competing endogenous RNA network (P<0.05).

| GO cellular component                     | GO         | Count | P-value                |
|-------------------------------------------|------------|-------|------------------------|
| Extracellular matrix                      | GO:0031012 | 10    | 1.95x10 <sup>-06</sup> |
| Fibrillar collagen trimer                 | GO:0005583 | 3     | 8.54x10 <sup>-06</sup> |
| Banded collagen fibril                    | GO:0098643 | 3     | 8.54x10 <sup>-06</sup> |
| Collagen-containing extracellular matrix  | GO:0062023 | 8     | 1.65x10 <sup>-05</sup> |
| Extracellular region                      | GO:0005576 | 26    | 3.03x10 <sup>-05</sup> |
| Complex of collagen trimers               | GO:0098644 | 3     | 3.73x10 <sup>-05</sup> |
| Collagen type V trimer                    | GO:0005588 | 2     | 7.26x10 <sup>-05</sup> |
| Integrin complex                          | GO:0008305 | 3     | 1.18x10 <sup>-04</sup> |
| Collagen trimer                           | GO:0005581 | 4     | 1.26x10 <sup>-04</sup> |
| Extracellular space                       | GO:0005615 | 21    | 1.65x10 <sup>-04</sup> |
| Basement membrane                         | GO:0005604 | 4     | 1.73x10 <sup>-04</sup> |
| Protein complex involved in cell adhesion | GO:0098636 | 3     | 1.77x10 <sup>-04</sup> |
| Endoplasmic reticulum lumen               | GO:0005788 | 6     | 2.19x10 <sup>-04</sup> |
| Interstitial matrix                       | GO:0005614 | 2     | 6.51x10 <sup>-04</sup> |
| Integral component of membrane            | GO:0016021 | 28    | 8.94x10 <sup>-04</sup> |
| Focal adhesion                            | GO:0005925 | 6     | 9.57x10 <sup>-04</sup> |
| Cell-substrate junction                   | GO:0030055 | 6     | 1.04x10 <sup>-03</sup> |
| Intrinsic component of membrane           | GO:0031224 | 28    | 1.05x10 <sup>-03</sup> |
| Plasma membrane                           | GO:0005886 | 27    | 1.59x10 <sup>-03</sup> |
| Cell periphery                            | GO:0071944 | 27    | 2.78x10 <sup>-03</sup> |

GO, Gene Ontology.
